# Supplementary material for: The chitin utilization mechanisms of a new Chitinibacter sp. isolate SCUT-21
Source: Royal Society of Chemistry journal article supplement (doi:10.1039/d3gc00969f), 2023-01-01
Supplement: d3gc00969f1.pdf [file d3gc00969f1.pdf]

## The chitin utilization mechanisms of a new *Chitinibacter* sp. isolate

### SCUT-21

Zhen-Dong Yang<sup>‡a</sup>, Ming-Shu Zhang<sup>‡a</sup>, De-Lin Lu<sup>a</sup>, Zhi-Wei Li<sup>a</sup>, He-Hua Mao<sup>b</sup>, Lei Wu<sup>a</sup>, Jia-Rui

Zhang<sup>a</sup>, Jing-Tao Ni<sup>a</sup>, Jun-Jin Deng<sup>c</sup>, and Xiao-Chun Luo<sup>†a</sup>

<sup>a</sup>. School of Biology and Biological Engineering, South China University of Technology, Guangzhou

Higher Education Mega Center, Panyu District, Guangzhou, Guangdong 510006, P. R. China.

<sup>b</sup>. The Affiliated Middle School of Lingnan Normal University, Chikan District, Zhanjiang,

Guangdong 524048, China.

<sup>c</sup>. Agro-biological Gene Research Center, Guangdong Academy of Agricultural Sciences, Guangdong

Provincial Key Laboratory of Crop Germplasm Resources Conservation and Utilization, Guangzhou

510640, China

<sup>†</sup> Corresponding author. E-Mail: xcluo@scut.edu.cn (X.-C. Luo), Tel/fax: 0086 (0)20 3938 0609.

<sup>‡</sup> These authors contributed equally to this work

**Supplementary Fig. 1.** Growth of *Vibrio alginolyticus*, *Vibrio harveyi* and *Vibrio parahaemolyticus* on LB+ colloidal chitin agar plates and the size of hydrolytic circles produced (5 days).

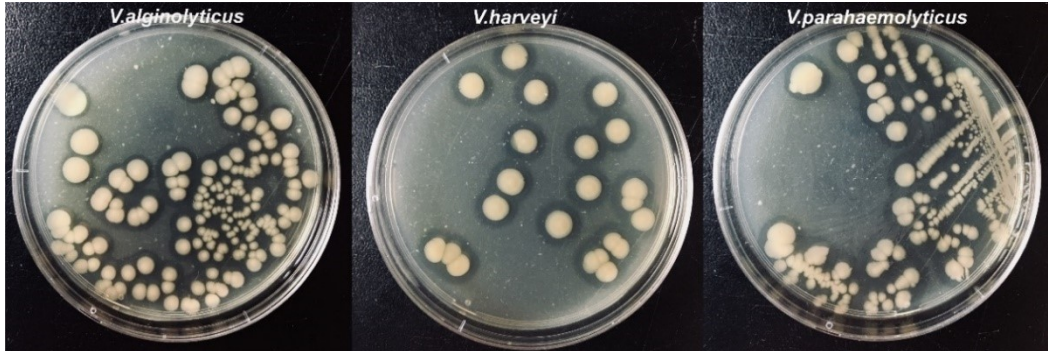

**Supplementary Fig. 2.** (A) After transferring new mediums, time course of SCUT-21 growth curve in 1% (w/v) chitin powder medium and basal medium; (B) After transferring new mediums time course of chitinase activity produced (tested by DMAB method) by SCUT-21 in 1%(w/v) chitin powder medium and basal medium; (C) Top 20 KEGG enrichment terms among DEGs. Circle size indicates the number of DEGs, while the color indicates p value.

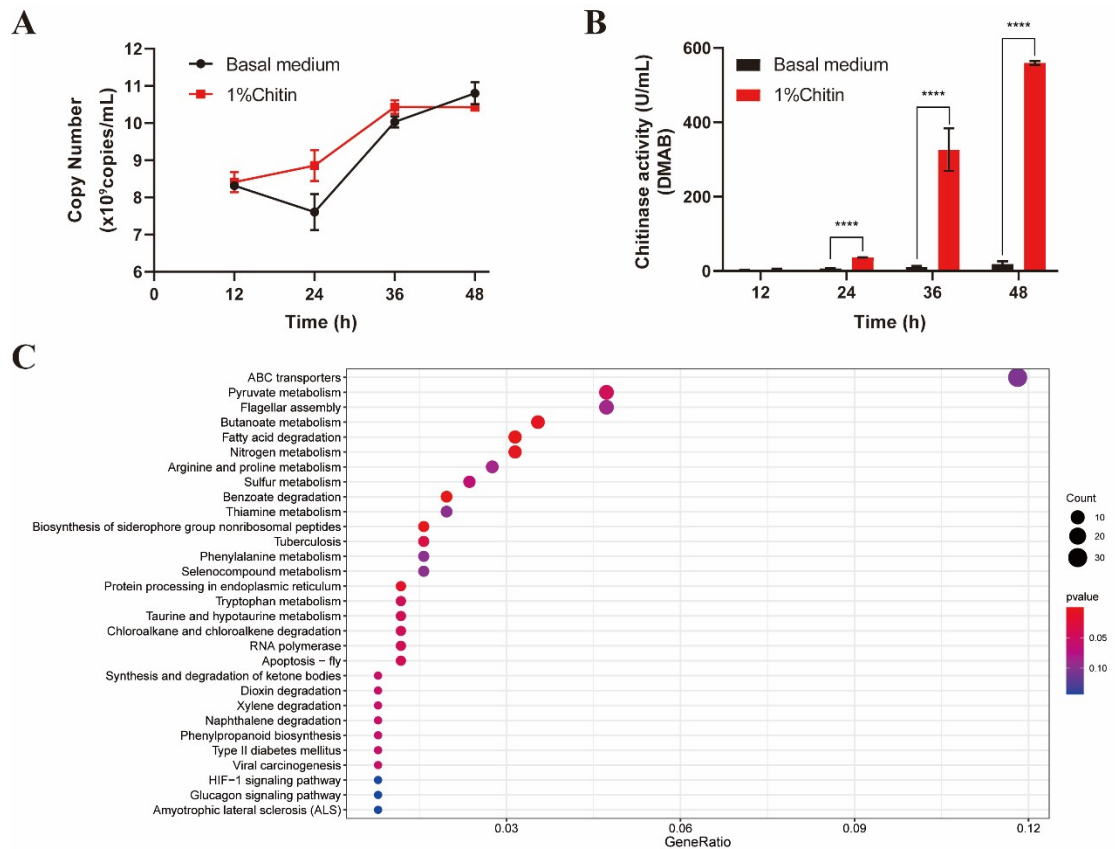

**Supplementary Fig. 3.** (A) Domain organization of chitinolytic enzymes. Protein domains, as identified with InterProScan data-bases are shown. SP, Singal Peptide; GH18\_Cat, Glycoside Hydrolase family 18 Catalytic Domain; GH19\_Cat, Glycoside Hydrolase family 19 Catalytic Domain; GH20\_Cat, Glycoside Hydrolase family 20 Catalytic Domain; CBM, Carbohydrate-binding module; CE4, carbohydrate esterase 4 (CE4) superfamily; AA10, Auxiliary Activity family 10 (B) Phylogenetic analysis of GH18 chitinases in SCUT-21. The black dot-marked chitinases are from SCUT-21. (C) Enzymatic parameters of the four recombinant chitinases the optimal pH and the optimal temperature.

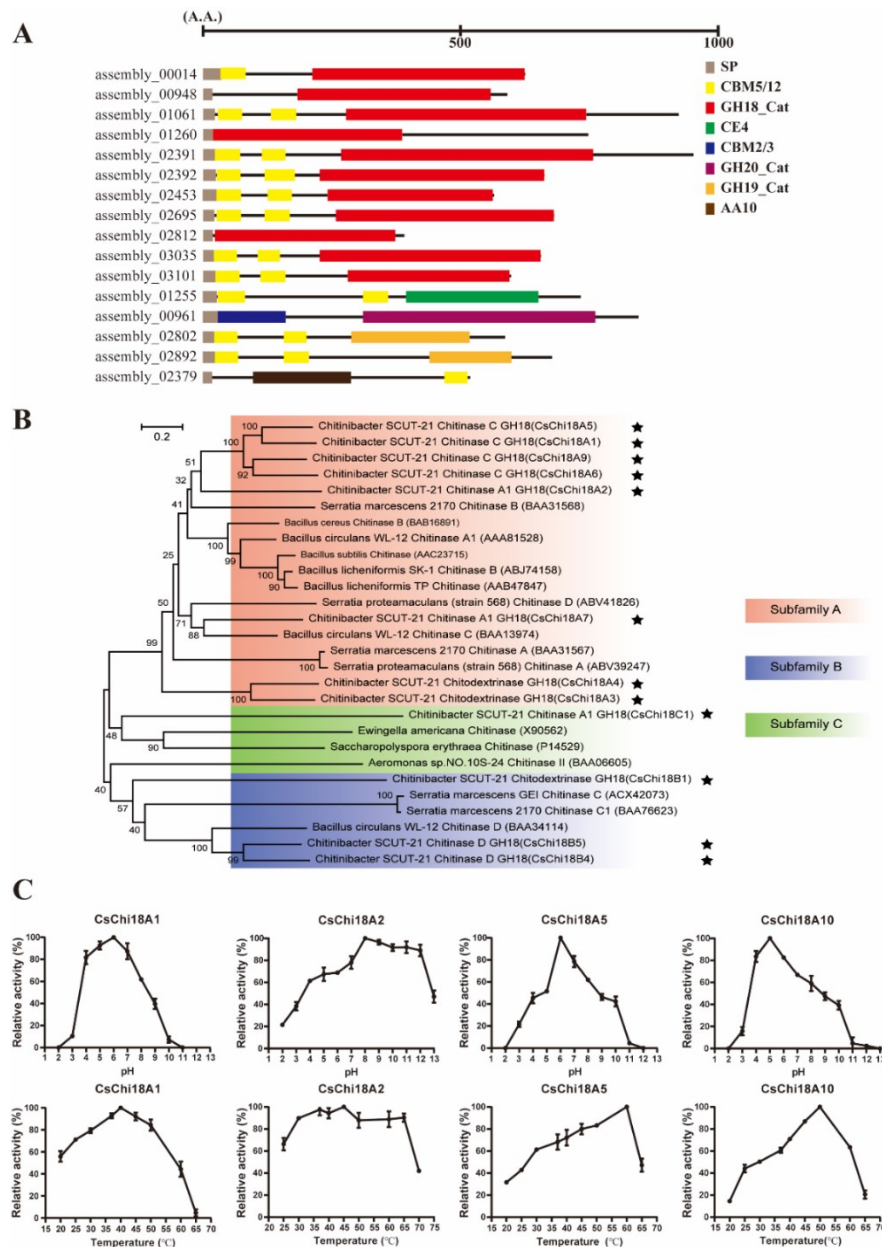

**Supplementary Fig. 4.** (A) Regulation of SCUT-21 extracellular protease genes identified by transcriptome analysis. (B) The turbidity of SCUT-21 in 1% chitin medium containing different Concentration of tryptone and glucose (3 days). (C) Effect of different tryptone concentrations on the residual amount of reducing sugar in the culture medium determined by the DMAB method (5 days). (D) Time course of the SCUT-21 growth curve in 1% chitin medium containing different nitrogen sources. (E) Time course of residual nitrate of SCUT-21 in 1% and 5% chitin medium. Time course of residual nitrate (black) and growth curve (red) of SCUT-21 in the (GlcNAc)<sub>2</sub> medium (F), GlcNAc medium (G), and glucose + NH<sub>4</sub><sup>+</sup> medium (H).

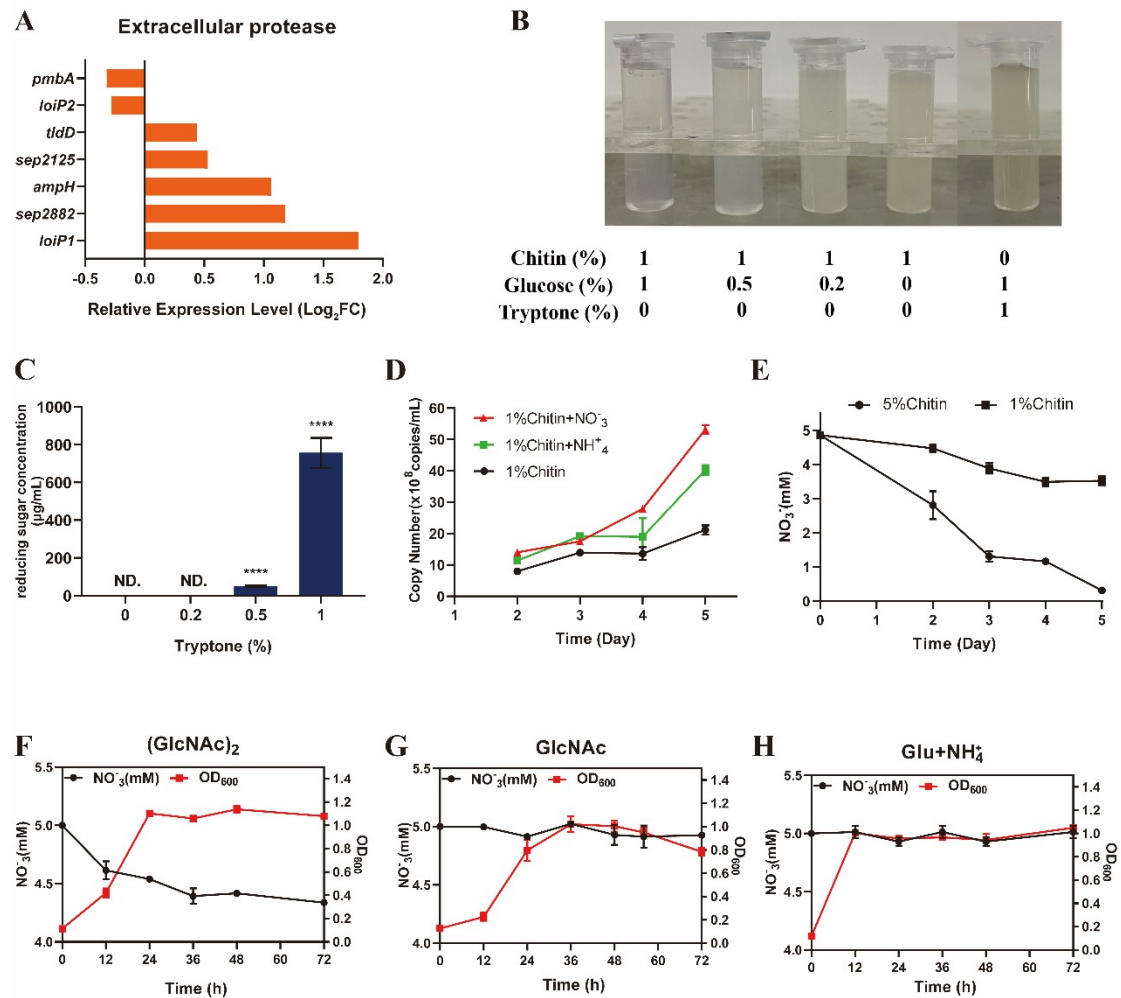

Supplementary Fig. 5. The DNS standard curve of *N*-acetylglucosamine.

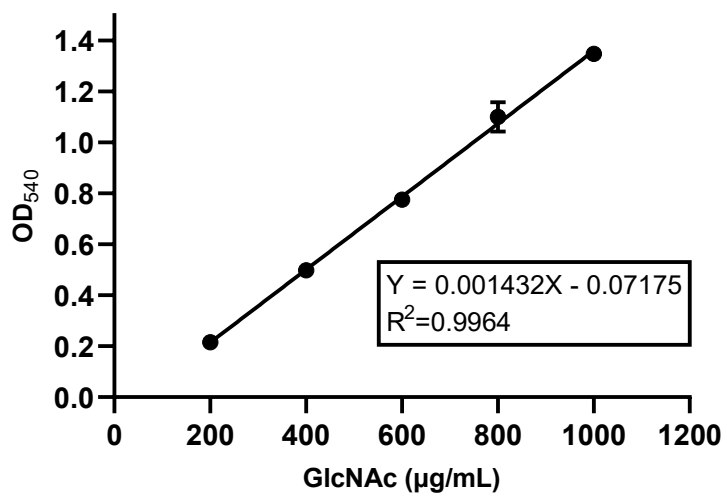

**Supplementary Table 1.** Bacterial strains and plasmids central to this study

| <b>Strains</b>                      | <b>Relevant Genotype</b>                                                                                                                                                    | <b>Source</b>                      |
|-------------------------------------|-----------------------------------------------------------------------------------------------------------------------------------------------------------------------------|------------------------------------|
| <i>Chitinibacter</i> sp. SCUT-21    | wild type                                                                                                                                                                   | This work                          |
| <i>Vibrio harveyi</i>               | wild type                                                                                                                                                                   | This work                          |
| <i>Vibrio parahaemolyticus</i>      | wild type                                                                                                                                                                   | This work                          |
| <i>Vibrio alginolyticus</i>         | wild type                                                                                                                                                                   | This work                          |
| <i>Escherichia coli</i> K-12        | wild type                                                                                                                                                                   | preserved in our laboratory        |
| <i>Escherichia coli</i> Trelief® 5α | F <sup>-</sup> φ 80(lacZ) Δ M15<br>Δ(lacZYA-argF)U169 deoR<br>recA1 endA1 hsdR17 (r K <sup>-</sup> , m<br>K <sup>+</sup> ) phoA supE44 λ <sup>-</sup> thi-1<br>gyrA96 relA1 | Tsingke Biotechnology Co.,<br>Ltd. |
| <i>Escherichia coli</i> BL21(DE3)   | F <sup>-</sup> ompT hsdS <sub>B</sub> (r <sub>B</sub> <sup>-</sup> m <sub>B</sub> <sup>-</sup> )gal<br>dcm(DE3)                                                             | Tsingke Biotechnology Co.,<br>Ltd. |
| <i>Pichia pastoris</i> GS115        | wild type                                                                                                                                                                   | preserved in our laboratory        |
| <b>Plasmids</b>                     | <b>Relevant Genotype</b>                                                                                                                                                    | <b>Source</b>                      |
| pET28(+)                            |                                                                                                                                                                             | preserved in our laboratory        |
| pET28(+)-CsChi18A1                  | as pET28(+), assembly_00014                                                                                                                                                 | This work                          |
| pET28(+)-CsChi18A5                  | as pET28(+), assembly_02392                                                                                                                                                 | This work                          |
| pET28(+)-CsChi18A9                  | as pET28(+), assembly_03035                                                                                                                                                 | This work                          |
| pET28(+)-CsNAGA                     | as pET28(+), assembly_00961                                                                                                                                                 | This work                          |
| pPIC9BM                             |                                                                                                                                                                             | preserved in our laboratory        |
| pPIC9BM- CsChi18A2                  | as pPIC9BM, assembly_00948                                                                                                                                                  | This work                          |

**Supplementary Table 2.** Primers used in PCR and RT-qPCR for gene expression

| Primers          | Primer sequence (5'–3')        |
|------------------|--------------------------------|
| 27F              | AGAGTTTGATCCTGGCTCAG           |
| 1492R            | TACGACTTAACCCCAATCGC           |
| CsChi18A1F       | CGCGGATCCTCTCCTGTTTGGCAGGAA    |
| CsChi18A1R       | CCCTCGAGTTGACGTA CTTGACCCA     |
| CsChi18A5F       | CGCGGATCCGCTGAGGCGTGGAAGAA     |
| CsChi18A5R       | CCCTCGAGTTGACGCGCTTACCCAT      |
| CsChi18A9F       | CGCGGATCCGCAACCGCCTGGAACA      |
| CsChi18A9R       | CCCTCGAGCTTATTAATATAAGTCATTG   |
| CsNAGA F         | CGCGGATCCATGACTAAACCTGCTG      |
| CsNAGA R         | CCGCTCGAGTACCGCAACAACGCGG      |
| CsChi18A2F       | CGCGGATCCACGGTTGTTTTGAAGAC     |
| CsChi18A2R       | CCGACGCGICTTCTTAATCATGCCTTTATA |
| 16sRNA-qpcR-F    | GACCAGGTAAGGTTTTTCGC           |
| 16sRNA-qpcR-R    | AGTTGTTGGGCTTTTCGGAG           |
| CsChi18A2-qpcr-F | AAAGTGGGAACACTACGAAA           |
| CsChi18A2-qpcr-R | CCTGCAACACCAGTAAGAAC           |
| CsChi18A1-qpcr-F | TTGGCAGGAAGGCATTAG             |
| CsChi18A1-qpcr-R | AGTCGGTTTAGCCGTAGG             |
| CsChi18A5-qpcr-F | AGTCGGTTTAGCCGTAGG             |
| CsChi18A5-qpcr-R | AGTCGGTTTAGCCGTAGG             |
| CsChi18A9-qpcr-F | TCTACGGTCGTGCTTTCT             |
| CsChi18A9-qpcr-R | ATCTTGGCTGCCTGTTTC             |
| chiA-qpcr-F      | AGTGGGAACACTACGA               |
| chiA-qpcr-R      | CTGCAACACCAGTAAGA              |
| narK-qpcr-F      | ATCAAAGAGGGCAGCGAA             |
| narK-qpcr-R      | ATCAAAGGGCCGAGGAAG             |



---

|              |                       |
|--------------|-----------------------|
| nirB-qpcr-F  | GCATCTGTCGTCCTACTTCTC |
| nirB -qpcr-R | ATGGCGTTTAAATCATCAATC |
| nirD -qpcr-F | CCACGCAACGACGAAACG    |
| nirD -qpcr-R | GGACTGGCCACCCACAGCT   |

---

**Supplementary Table 3.** Degradation ability of CDBs by hydrolysis halo method (5 days)

| <b>Culture medium</b>            | <b>Colloidal Chitin</b> | <b>LB+Colloidal Chitin</b> |
|----------------------------------|-------------------------|----------------------------|
| <b>Strains</b>                   |                         |                            |
| <i>Chitinibacter</i> sp. SCUT-21 | 4.66 (2.33/0.50)        | 4.11(1.85/0.45)            |
| <i>Deefgea chitinilytica</i>     | 4.50 (2.25/0.5)         | 2.91 (1.89/0.65)           |
| <i>Chitinilyticum litopenaei</i> | 4.17 (2.59/0.62)        | 2.40 (2.45/1.02)           |
| <i>Chitinibacter tainanensis</i> | 3.73 (2.05/0.55)        | 2.88 (2.45/0.85)           |
| <i>Aeromonas hydrophila</i>      | 3.38 (1.62/0.48)        | 1.76 (2.78/1.58)           |
| <i>Bacillus cereus</i>           | 1.22 (1.10/0.90)        | 1.00 (5.63/5.61)           |
| <i>Roseateles depolymerans</i>   | 1.14 (2.51/2.2)         | 0 (0/0.72)                 |
| <i>Pelomonas saccharophila</i>   | 1.02 (0.69/0.68)        | 1.01 (2.82/2.79)           |
| <i>Chitinimonas taiwanensis</i>  | 0 (0/0.39)              | 0 (0/0.24)                 |
| <i>Flavobacterium johnsoniae</i> | 0 (0/0.32)              | 0 (0/0.55)                 |
| <i>Bacillus tropicus</i>         | 0 (0/0.48)              | 0 (0/0.29)                 |
| <i>Vibrio alginolyticus</i>      | 0                       | 1.04 (8.25/7.91)           |
| <i>Vibrio harveyi</i>            | 0                       | 1.35 (2.50/1.85)           |
| <i>Vibrio parahaemolyticus</i>   | 0                       | 1.18 (2.35/1.98)           |

**Supplementary Table 4.** The physiological and biochemical characteristics of *Chitinibacter* sp.

SCUT-21, *Chitinibacter* sp. GC72 and *Chitinibacter suncheonensis* strain SK16.

| <b>Characteristic</b>          | <b><i>Chitinibacter</i> sp.<br/>SCUT-21</b> | <b><i>Chitinibacter</i> sp. GC72</b> | <b><i>Chitinibacter</i><br/><i>suncheonensis</i><br/>strain SK16</b> |
|--------------------------------|---------------------------------------------|--------------------------------------|----------------------------------------------------------------------|
| Gram stain                     | G <sup>-</sup>                              | G <sup>-</sup>                       | G <sup>-</sup>                                                       |
| Growth between<br>temperatures | 25°C-40°C                                   | 20-37°C                              | 15–37°C                                                              |
| Growth between pH              | 6.0-9.0                                     | 7.0-10.0                             | 7.0-10.0                                                             |
| 1%NaCl                         | +                                           | +                                    | +                                                                    |
| Chitin hydrolysis              | +                                           | +                                    | +                                                                    |
| Cellulose hydrolysis           | -                                           | NT                                   | NT                                                                   |
| Starch hydrolysis              | -                                           | NT                                   | NT                                                                   |
| Dextrin hydrolysis             | -                                           | +                                    | -                                                                    |
| Glucose                        | +                                           | +                                    | +                                                                    |
| D-Maltose                      | +                                           | -                                    | +                                                                    |
| GlcNAc                         | +                                           | +                                    | +                                                                    |
| Arabinose                      | -                                           | -                                    | -                                                                    |
| lactose                        | -                                           | -                                    | -                                                                    |
| Cellobiose                     | -                                           | -                                    | -                                                                    |
| Rhamnose                       | -                                           | -                                    | -                                                                    |
| mannitol                       | -                                           | -                                    | -                                                                    |
| Nitrate reduction              | +                                           | NT                                   | +                                                                    |

**NOTE: “+” Positive, “-” negative, “NT” not tested.**

**Supplementary Table 5.** Average genomic nucleotide identity analysis of SCUT-21 relative to other strains.

| <b>Stains</b>                                                      | <b>Genome size<br/>(Mbp)</b> | <b>ANI<br/>(%)</b> | <b>GenBank<br/>accession number</b> | <b>GC count<br/>(%)</b> |
|--------------------------------------------------------------------|------------------------------|--------------------|-------------------------------------|-------------------------|
| <i>Chitinibacter</i> sp. GC72                                      | 3.46                         | 78.71              | GCF_009760905.1                     | 54.00                   |
| <i>Chitinibacter fontanus</i><br>strain STM-7                      | 3.63                         | 78.65              | GCF_013423785.1                     | 50.30                   |
| <i>Chitinibacter bivalviorum</i><br>strain 2T18                    | 3.68                         | 77.51              | GCF_013403565.1                     | 50.61                   |
| <i>Chitinibacter tainanensis</i><br>DSM 15459                      | 3.43                         | 75.63              | GCF_000429785.1                     | 56.10                   |
| <i>Chitinibacter</i> sp.<br>ZOR0017                                | 3.48                         | 75.47              | GCF_000799095.1                     | 55.90                   |
| <i>Deefgea chitinilytica</i>                                       | 3.40                         | 74.08              | GCF_016881405.1                     | 48.29                   |
| <i>Deefgea rivuli</i>                                              | 3.71                         | 73.85              | GCF_000620145.1                     | 49.03                   |
| <i>Chitinilyticum litopenaei</i><br>DSM 21440                      | 3.97                         | 71.12              | GCF_000428145.1                     | 62.64                   |
| <i>Chitinilyticum aquatile</i><br>DSM 21506                        | 3.69                         | 70.82              | GCF_000430805.1                     | 60.30                   |
| <i>Amantichitinum ursilacus</i>                                    | 4.93                         | 70.27              | GCF_001294205.1                     | 60.09                   |
| <i>Chitinolyticbacter</i><br><i>meiyuanensis</i> strain<br>SYBC-H1 | 4.33                         | 70.20              | GCF_008033135.1                     | 63.53                   |

**Supplementary Table 6.** Significantly differentially expressed chitin-related metabolizes genes in chitin powder medium, compared with Basal medium, cultured SCUT-21.

| <b>Gene ID</b>                         | <b>Description</b>                                                  | <b>log<sub>2</sub>FC</b> |
|----------------------------------------|---------------------------------------------------------------------|--------------------------|
| <b>Chitinolytic enzymes</b>            |                                                                     |                          |
| assembly_02392                         | CsChi18A5                                                           | 5.63                     |
| assembly_01255                         | CsChi18B1                                                           | 5.00                     |
| assembly_03101                         | CsChi18B5                                                           | 3.70                     |
| assembly_02391                         | CsChi18A4                                                           | 3.60                     |
| assembly_01254                         | polysaccharide deacetylase family protein (Cda)                     | 2.52                     |
| assembly_02379                         | CsLPMO                                                              | 2.43                     |
| assembly_02892                         | CsChi19B                                                            | 2.26                     |
| assembly_00948                         | CsChi18A2                                                           | 2.12                     |
| assembly_03035                         | CsChi18A9                                                           | 2.06                     |
| assembly_02802                         | CsChi19A                                                            | 1.93                     |
| assembly_02695                         | CsChi18A6                                                           | 1.60                     |
| assembly_02453                         | CsChi18B4                                                           | 0.82                     |
| assembly_01061                         | CsChi18A3                                                           | 0.76                     |
| assembly_00014                         | CsChi18A1                                                           | 0.42                     |
| assembly_02767                         | CsChi18A7                                                           | 0.28                     |
| assembly_01260                         | CsChi18C1                                                           | 0.01                     |
| assembly_00961                         | CsNAGA                                                              | 0.01                     |
| assembly_02812                         | CsChi18A8                                                           | -0.71                    |
| assembly_01919                         | CsChi18B2                                                           | -1.38                    |
| assembly_02073                         | CsChi18B3                                                           | -2.56                    |
| <b>GlcNAc and COS transport System</b> |                                                                     |                          |
| <b>GlcNAc transporter</b>              |                                                                     |                          |
| assembly_00439                         | PTS system N-acetylglucosamine-specific EIICBA component (nagEIII1) | 2.63                     |

---

|                                                   |                                                                       |       |
|---------------------------------------------------|-----------------------------------------------------------------------|-------|
| assembly_00438                                    | PTS system N-acetylglucosamine-specific EIICBA component (nagEII2)    | 1.33  |
| assembly_00854                                    | HPr kinase/phosphorylase                                              | 0.31  |
| assembly_01945                                    | Phosphoenolpyruvate-protein phosphotransferase (EI)                   | 0.23  |
| <b>(GlcNAc)<sub>2</sub> transporter</b>           |                                                                       |       |
| assembly_01006                                    | Putative chitobiose transport system permease protein (chiF)          | 4.24  |
| assembly_01005                                    | putative chitobiose transport system substrate-binding protein (chiE) | 3.19  |
| assembly_01004                                    | Maltose/maltodextrin import ATP-binding protein (malK1)               | 2.47  |
| assembly_01007                                    | putative chitobiose transport system permease protein (chiG)          | 1.90  |
| <b>(GlcN)<sub>2</sub> transporter (potential)</b> |                                                                       |       |
| assembly_01268                                    | Putative chitobiose transport system permease protein (chi1)          | 1.37  |
| assembly_01269                                    | Putative chitobiose transport system permease protein (chi2)          | 0.38  |
| assembly_01270                                    | Maltose/maltodextrin import ATP-binding protein (malK2)               | 0.44  |
| <b>(GlcNAc)<sub>n</sub> transporter</b>           |                                                                       |       |
| assembly_01109                                    | Chitoporin (chiP1)                                                    | 2.70  |
| assembly_02358                                    | Chitoporin (chiP2)                                                    | 1.96  |
| <b>GlcNAc intracellular catabolism</b>            |                                                                       |       |
| assembly_00556                                    | Glucosamine-6-phosphate deaminase (nagB)                              | 2.15  |
| assembly_02510                                    | N-acetylglucosamine kinase (nagK)                                     | 0.57  |
| assembly_02800                                    | Beta-hexosaminidase (nagZ)                                            | 0.40  |
| assembly_01009                                    | Glucosamine kinase (gspK)                                             | -0.04 |

---

**Supplementary Table 7.** Significantly differentially expressed carbon-related metabolizes genes in chitin powder medium, compared with Basal medium, cultured SCUT-21.

| <b>Gene ID</b>          | <b>Description</b>                                                                                       | <b>log<sub>2</sub>FC</b> |
|-------------------------|----------------------------------------------------------------------------------------------------------|--------------------------|
| <b>TCA</b>              |                                                                                                          |                          |
| assembly_01841          | Isocitrate dehydrogenase kinase/phosphatase (aceK)                                                       | 1.22                     |
| assembly_00652          | Dihydrolipoyllysine-residue succinyltransferase component of 2-oxoglutarate dehydrogenase complex (sucB) | 1.01                     |
| assembly_00649          | Succinate--CoA ligase [ADP-forming] subunit alpha (sucD)                                                 | 0.99                     |
| assembly_00653          | 2-oxoglutarate dehydrogenase E1 component (sucA)                                                         | 0.95                     |
| assembly_00651          | Dihydrolipoyl dehydrogenase (lpdA)                                                                       | 0.88                     |
| assembly_00650          | Succinate--CoA ligase [ADP-forming] subunit beta (sucC)                                                  | 0.82                     |
| assembly_00654          | Citrate synthase (prpC)                                                                                  | 0.17                     |
| assembly_02775          | Isocitrate dehydrogenase [NADP] (idh)                                                                    | -0.06                    |
| assembly_00259          | Aconitate hydratase B (acnB)                                                                             | -0.31                    |
| <b>Glyoxylate cycle</b> |                                                                                                          |                          |
| assembly_02674          | Malate synthase (mls)                                                                                    | 3.55                     |
| assembly_02675          | Isocitrate lyase (icl)                                                                                   | 3.31                     |
| assembly_01059          | Phosphate acetyltransferase (pta1)                                                                       | 2.83                     |
| assembly_01836          | Phosphate acetyltransferase (pta2)                                                                       | 1.23                     |
| assembly_01159          | Acetyl-coenzyme A synthetase (acs)                                                                       | 1.10                     |
| <b>Bifidum pathway</b>  |                                                                                                          |                          |
| assembly_01689          | Xylulose-5-phosphate phosphoketolase (xfp)                                                               | 4.91                     |
| assembly_02958          | Pyruvate kinase II (pykA1)                                                                               | 3.78                     |
| assembly_02513          | Transketolase (tkt)                                                                                      | 3.56                     |
| assembly_02400          | Transaldolase (tal)                                                                                      | 2.84                     |
| assembly_01111          | Glyceraldehyde-3-phosphate dehydrogenase A (gapA)                                                        | 2.56                     |
| assembly_01459          | Ribose-5-phosphate isomerase A (rpiA)                                                                    | 2.34                     |
| assembly_01891          | Acetate kinase (ackA)                                                                                    | 2.21                     |

|                             |                                                                                                  |      |
|-----------------------------|--------------------------------------------------------------------------------------------------|------|
| assembly_00682              | Pyruvate kinase II (pykA2)                                                                       | 2.20 |
| assembly_00167              | Enolase (eno)                                                                                    | 1.74 |
| assembly_02596              | Triosephosphate isomerase (tpi)                                                                  | 1.40 |
| assembly_00073              | Ribulose-phosphate 3-epimerase (rpe)                                                             | 0.88 |
| assembly_02662              | 2,3-bisphosphoglycerate-independent phosphoglycerate mutase (gpmI)                               | 0.84 |
| assembly_01671              | Glyceraldehyde-3-phosphate dehydrogenase 3 (gap)                                                 | 0.57 |
| assembly_01119              | Dihydrolipoyllysine-residue acetyltransferase component of pyruvate dehydrogenase complex (pdhF) | 0.57 |
| assembly_00714              | Triosephosphate isomerase (tpi)                                                                  | 0.49 |
| assembly_01118              | Pyruvate dehydrogenase E1 component (pdhE)                                                       | 0.26 |
| <b>Butanoate metabolism</b> |                                                                                                  |      |
| assembly_00662              | Phasin family protein (pha1)                                                                     | 4.39 |
| assembly_00301              | Phasin family protein (pha2)                                                                     | 4.31 |
| assembly_00457              | Acetyl-CoA acetyltransferase (phaA)                                                              | 3.31 |
| assembly_00458              | Poly(3-hydroxyalkanoate) polymerase subunit (phaC1)                                              | 3.26 |
| assembly_02733              | (R)-specific enoyl-CoA hydratase (phaJ)                                                          | 2.88 |
| assembly_00163              | Acetoacetyl-CoA reductase (phaB)                                                                 | 2.55 |
| assembly_02512              | Poly(3-hydroxyalkanoate) polymerase subunit (phaC2)                                              | 1.96 |
| assembly_01635              | D-beta-hydroxybutyrate dehydrogenase (bhd1)                                                      | 1.82 |
| assembly_00110              | putative 3-hydroxyacyl-CoA dehydrogenase (hadh)                                                  | 1.76 |
| assembly_00228              | Formate acetyltransferase 1 (pflB)                                                               | 0.61 |
| assembly_00227              | Formate acetyltransferase (pfl)                                                                  | 0.17 |

---



**Supplementary Table 8.** Significantly differentially expressed nitrogen-related metabolizes genes in chitin powder medium, compared with Basal medium, cultured SCUT-21.

| Gene ID                    | Description                                                      | log <sub>2</sub> FC |
|----------------------------|------------------------------------------------------------------|---------------------|
| <b>Nitrate metabolism</b>  |                                                                  |                     |
| assembly_00645             | Nitrate/nitrite transporter (narK)                               | 5.79                |
| assembly_00644             | Nitrite reductase [NAD(P)H] (nirB)                               | 3.07                |
| assembly_00643             | Nitrite reductase (NADH) small subunit (nirD)                    | 1.70                |
| assembly_00908             | Formate-dependent nitrite reductase complex subunit (nrfG)       | 1.17                |
| assembly_00906             | Nitrate/nitrite response regulator protein (narL)                | 0.99                |
| assembly_00903             | Ferredoxin-type protein (napF)                                   | 0.56                |
| assembly_00905             | Nitrate/nitrite sensor protein (narX)                            | 0.38                |
| assembly_00901             | Periplasmic nitrate reductase (napA)                             | 0.34                |
| assembly_00900             | Periplasmic nitrate reductase , electron transfer subunit (napB) | 0.27                |
| <b>Ccm system</b>          |                                                                  |                     |
| assembly_00909             | Cytochrome c-type biogenesis protein (ccmH)                      | 1.24                |
| assembly_00916             | Cytochrome c biogenesis ATP-binding export protein (ccmA)        | 0.85                |
| assembly_00910             | Thiol:disulfide interchange protein (ccmG)                       | 0.82                |
| assembly_00911             | Cytochrome c-type biogenesis protein (ccmF)                      | 0.72                |
| assembly_00912             | Cytochrome c-type biogenesis protein (ccmE)                      | 0.50                |
| assembly_00914             | Heme exporter protein C (ccmC)                                   | 0.44                |
| assembly_00915             | Heme exporter protein B (ccmB)                                   | 0.33                |
| <b>Ammonium metabolism</b> |                                                                  |                     |
| assembly_01469             | Ferredoxin-dependent glutamate synthase 1 (glu)                  | 3.67                |
| assembly_01468             | Glutamate synthase [NADPH] small chain (gltD)                    | 1.86                |

|                                         |                                                                               |      |
|-----------------------------------------|-------------------------------------------------------------------------------|------|
| assembly_01464                          | Glutamate synthase [NADPH] small chain (gltD)                                 | 1.68 |
| assembly_01465                          | Glutamate synthase [NADPH] large chain (gltB)                                 | 0.80 |
| assembly_01000                          | Ammonia channel (Amt)                                                         | 0.47 |
| assembly_00782                          | Glutamine synthetase (glnA)                                                   | 0.41 |
| <b>Pyrimidine and purine metabolism</b> |                                                                               |      |
| assembly_00015                          | Dihydroorotate dehydrogenase A (fumarate) (pyrD)                              | 5.22 |
| assembly_02440                          | Anaerobic ribonucleoside-triphosphate reductase<br>(nrdD)                     | 4.27 |
| assembly_02439                          | Anaerobic ribonucleoside-triphosphate reductase-<br>activating protein (nrdG) | 1.57 |
| assembly_01013                          | Methanol dehydrogenase activator (act)                                        | 1.44 |
| assembly_01434                          | DNA-directed RNA polymerase subunit beta' (rpoB1)                             | 1.39 |
| assembly_00215                          | 5'-nucleotidase (surE)                                                        | 1.39 |
| assembly_03137                          | Deoxyguanosinetriphosphate triphosphohydrolase<br>(dgt)                       | 1.33 |
| assembly_01404                          | DNA-directed RNA polymerase subunit alpha (rpoA)                              | 1.15 |
| assembly_01435                          | DNA-directed RNA polymerase subunit beta (rpoB2)                              | 1.10 |
| assembly_03136                          | Ribonucleoside-diphosphate reductase subunit beta<br>(nrdB)                   | 1.05 |
| assembly_01457                          | Exopolyphosphatase (ppx)                                                      | 1.04 |
| assembly_01017                          | Phosphoglucomutase (algC)                                                     | 0.83 |
| assembly_01475                          | Phosphoribosylamine--glycine ligase (purD)                                    | 0.77 |
| assembly_02681                          | Formate-dependent phosphoribosylglycinamide<br>formyltransferase (purT)       | 0.69 |
| assembly_02684                          | Putative bifunctional exonuclease/endonuclease<br>protein                     | 0.56 |
| assembly_02703                          | Adenylate kinase (adk)                                                        | 0.53 |
| assembly_01158                          | DNA polymerase III PolC-type (polC)                                           | 0.50 |

---

| <b>Amino Acids biosynthesis</b> |                                                                              |      |
|---------------------------------|------------------------------------------------------------------------------|------|
| assembly_00034                  | 5-methyltetrahydropteroyltriglutamate--homocysteine methyltransferase (metE) | 4.09 |
| assembly_01356                  | 2-isopropylmalate synthase (leuA)                                            | 2.81 |
| assembly_00555                  | 3-isopropylmalate dehydrogenase (leuB)                                       | 2.76 |
| assembly_00275                  | Cyclohexadienyl dehydrogenase (tyrC)                                         | 1.79 |
| assembly_00210                  | LL-diaminopimelate aminotransferase (argD)                                   | 1.44 |
| assembly_00033                  | HTH-type transcriptional regulator (metR)                                    | 1.39 |
| assembly_01351                  | Ketol-acid reductoisomerase (NADP (+)) (ilvC)                                | 1.13 |
| assembly_01350                  | Acetolactate synthase isozyme 3 small subunit (ilvH)                         | 1.04 |
| assembly_00482                  | Diaminopimelate epimerase (dapF)                                             | 0.95 |
| assembly_01349                  | Acetolactate synthase isozyme 3 large subunit (ilvI)                         | 0.84 |
| assembly_01869                  | Phospho-2-dehydro-3-deoxyheptonate aldolase, Phe-sensitive (aroG)            | 0.76 |
| assembly_00593                  | Indole-3-glycerol phosphate synthase (trpC)                                  | 0.75 |
| assembly_00589                  | Anthranilate synthase component 1 (trpE)                                     | 0.63 |
| assembly_03209                  | P-protein                                                                    | 0.62 |
| assembly_00211                  | 2,3,4,5-tetrahydropyridine-2,6-dicarboxylate N-succinyltransferase (dapD)    | 0.62 |
| assembly_01648                  | 4-hydroxy-tetrahydrodipicolinate reductase (dapB)                            | 0.54 |
| assembly_02887                  | Homoserine dehydrogenase (metM)                                              | 0.54 |
| assembly_02804                  | 3-phosphoshikimate 1-carboxyvinyltransferase (aroA)                          | 0.52 |
| assembly_00557                  | 3-isopropylmalate dehydratase small subunit 1 (leuD)                         | 0.49 |
| <b>Ribosomal protein</b>        |                                                                              |      |
| assembly_01405                  | 30S ribosomal protein S4                                                     | 1.73 |
| assembly_01437                  | 50S ribosomal protein L10                                                    | 1.59 |
| assembly_01434                  | DNA-directed RNA polymerase subunit beta'                                    | 1.39 |
| assembly_01404                  | DNA-directed RNA polymerase subunit alpha                                    | 1.15 |

---

|                  |                                          |       |
|------------------|------------------------------------------|-------|
| assembly_01435   | DNA-directed RNA polymerase subunit beta | 1.10  |
| assembly_01422   | 30S ribosomal protein S3                 | 1.06  |
| assembly_01406   | 30S ribosomal protein S11                | 0.97  |
| assembly_01421   | 50S ribosomal protein L16                | 0.92  |
| assembly_01411   | 30S ribosomal protein S5                 | 0.75  |
| assembly_01436   | 50S ribosomal protein L7/L12             | 0.73  |
| assembly_01420   | 50S ribosomal protein L29                | 0.61  |
| assembly_01409   | 50S ribosomal protein L15                | 0.58  |
| <b>Proteases</b> |                                          |       |
| assembly_01739   | Metalloprotease (loiP1)                  | 1.80  |
| assembly_02882   | putative zinc protease (sep2882)         | 1.18  |
| assembly_00459   | D-alanyl-D-alanine endopeptidase (ampH)  | 1.06  |
| assembly_02125   | Extracellular basic protease (sep2125)   | 0.53  |
| assembly_00723   | Metalloprotease (tldD)                   | 0.44  |
| assembly_01928   | Metalloprotease (loiP2)                  | -0.28 |
| assembly_00012   | Metalloprotease (pmbA)                   | -0.32 |

**Table S9.** Significantly differentially expressed other genes in chitin powder medium, compared with Basal medium, cultured SCUT-21.

| <b>Gene ID</b>           | <b>Description</b>                                       | <b>log<sub>2</sub>FC</b> |
|--------------------------|----------------------------------------------------------|--------------------------|
| <b>Regulator factoer</b> |                                                          |                          |
| assembly_00427           | Putative anti-sigma factor antagonist                    | 5.46                     |
| assembly_01709           | Response regulator (pleD)                                | 4.11                     |
| assembly_00212           | RNA polymerase sigma factor (rpoS)                       | 2.27                     |
| assembly_01348           | RNA polymerase sigma factor (sigV)                       | 1.30                     |
| assembly_00770           | ATP-dependent Clp protease ATP-binding subunit<br>(clpX) | 0.91                     |
| assembly_00771           | ATP-dependent Clp protease proteolytic subunit<br>(clpP) | 0.72                     |
| assembly_01154           | HTH-type transcriptional regulator (yofA)                | 1.70                     |
| assembly_02657           | HTH-type transcriptional regulator (gntR)                | 1.54                     |
| assembly_00033           | HTH-type transcriptional regulator (metR)                | 1.39                     |
| assembly_01618           | Response regulator (mprA)                                | 1.35                     |
| assembly_02493           | DNA-binding transcriptional regulator (ntrC)             | 1.32                     |
| assembly_01819           | HTH-type transcriptional regulator (pgrR)                | 1.13                     |
| assembly_01984           | Response regulator protein (vraR)                        | 1.01                     |
| assembly_00906           | Nitrate/nitrite response regulator protein (narL)        | 0.99                     |
| assembly_02002           | HTH-type transcriptional regulator (dmlR)                | 0.88                     |
| assembly_02351           | putative HTH-type transcriptional regulator (yfiR)       | 0.81                     |
| assembly_00620           | HTH-type transcriptional regulator (argP)                | 0.74                     |
| assembly_00783           | Response regulator (pleD)                                | 0.73                     |
| assembly_01286           | Response regulator (pleD)                                | 0.71                     |
| assembly_01874           | HTH-type transcriptional regulator (dmlR)                | 0.64                     |
| assembly_02088           | HTH-type transcriptional regulator (cysL)                | 0.62                     |
| assembly_00107           | putative HTH-type transcriptional regulator (ytpP)       | 0.50                     |

|                                 |                                                                   |       |
|---------------------------------|-------------------------------------------------------------------|-------|
| assembly_02949                  | Chemotaxis response regulator protein-glutamate<br>methylesterase | 0.50  |
| assembly_02245                  | RNA polymerase sigma factor (rpoH)                                | -1.24 |
| assembly_03157                  | Sigma factor AlgU regulatory protein (mucB)                       | -1.80 |
| assembly_03156                  | Anti-sigma-E factor (rseA)                                        | -2.14 |
| <b>Secretion system</b>         |                                                                   |       |
| <b>Type I secretion system</b>  |                                                                   |       |
| assembly_00354                  | Hemolysin secretion protein D (hlyD)                              | 2.66  |
| assembly_00351                  | Alpha-hemolysin translocation ATP-binding protein<br>(hlyB)       | 1.06  |
| <b>Type II secretion system</b> |                                                                   |       |
| assembly_02331                  | Type II secretion system protein I (gspI)                         | 4.52  |
| assembly_03027                  | Type II secretion system protein D (gspD)                         | 1.78  |
| assembly_01525                  | Putative type II secretion system protein F (gspF1)               | 1.20  |
| assembly_03026                  | Type II secretion system protein G (gspG)                         | 1.19  |
| assembly_03033                  | Putative type II secretion system protein F (gspF2)               | 0.94  |
| assembly_03025                  | Type II secretion system protein G (gspG)                         | 0.84  |
| assembly_03032                  | putative type II secretion system protein (hxcR)                  | 0.84  |
| assembly_02332                  | Type II secretion system protein J (gspJ)                         | 0.75  |
| assembly_02327                  | Putative type II secretion system protein F (gspF)                | 0.54  |
| <b>Tat secretion system</b>     |                                                                   |       |
| assembly_01562                  | Sec-independent protein translocase protein (tatA)                | 2.66  |
| assembly_01563                  | Sec-independent protein translocase protein (tatB)                | 1.25  |
| assembly_01560                  | Sec-independent protein translocase protein (tatC)                | 0.45  |
